# Supplementary material for: Whole-genome sequencing investigation of animal-skin-drum-associated UK anthrax cases reveals evidence of mixed populations and relatedness to a US case
Source: PubMed Central journal article supplement (PMC5320680; doi:10.1099/mgen.0.000039), 2015-11-07
Supplement: mgen-01-39-s001.pdf [file mgen-01-39-s001.pdf]

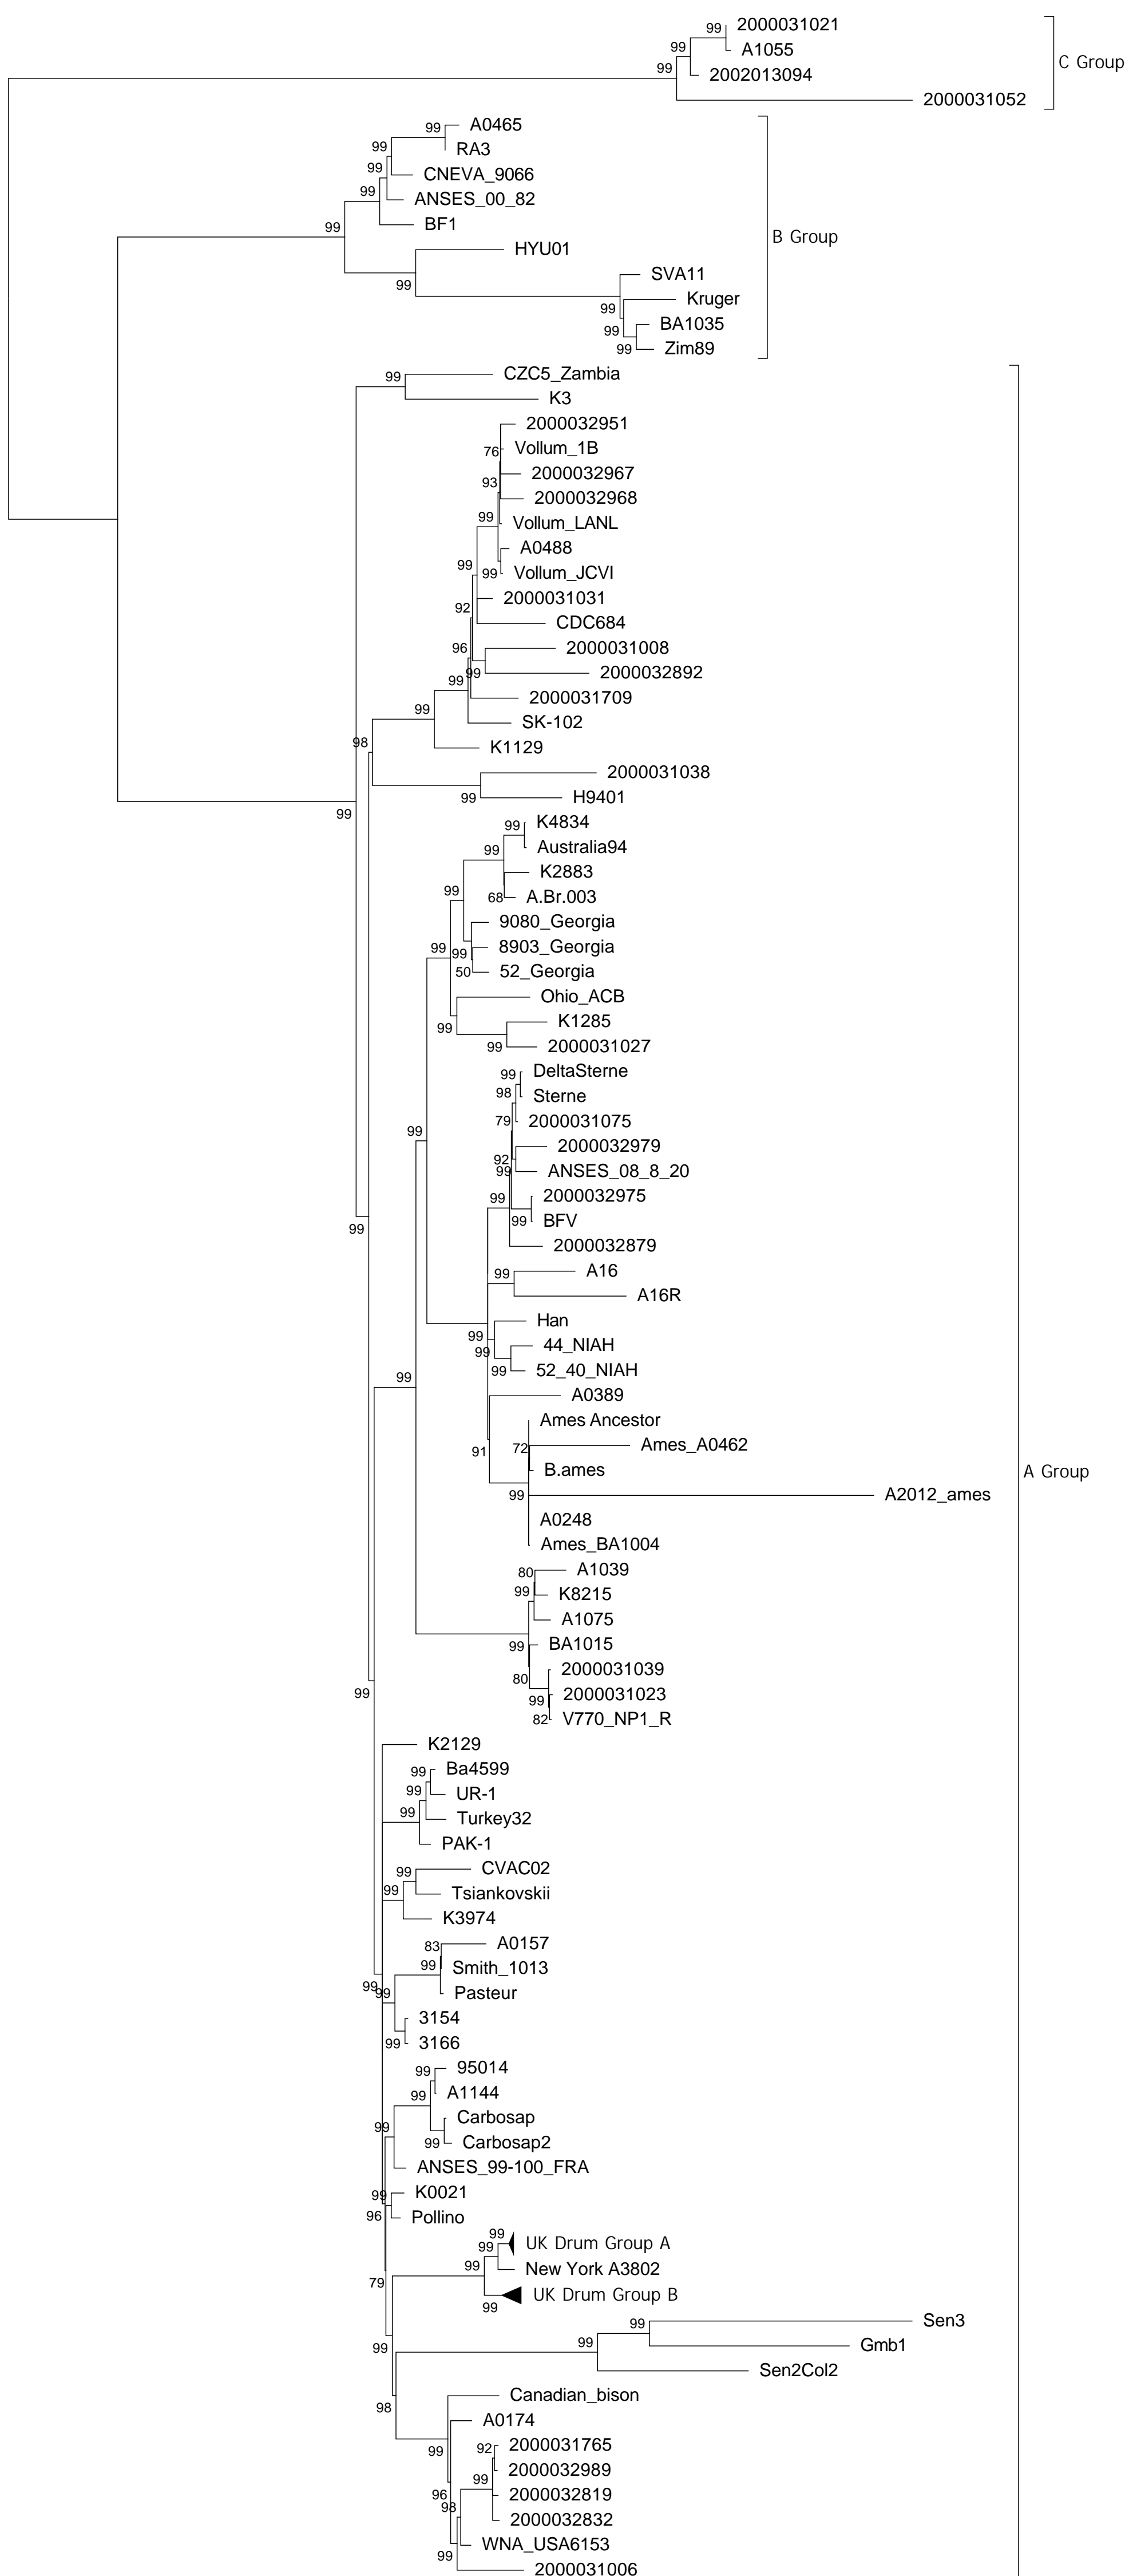

100

| Isolate      | Profile | Sample source                     | vrrA       | vrrB1 | vrrB2 | vrrC1      | vrrC2 | CG3 | pX01 | pX02 |
|--------------|---------|-----------------------------------|------------|-------|-------|------------|-------|-----|------|------|
| Scotland_459 | M1      | Environmental - Drum              | 313        | 229   | 153   | 468        | 498   | 153 | 120  | 135  |
| Scotland_472 | M1      | Clinical                          | 313        | 229   | 153   | 468        | 498   | 153 | 120  | 135  |
| Scotland_473 | M1      | Clinical                          | 313        | 229   | 153   | 468        | 498   | 153 | 120  | 135  |
| Scotland_474 | M2      | Environmental - Hide              | <b>289</b> | 229   | 153   | 468        | 498   | 153 | 120  | 135  |
| Scotland_476 | M1      | Environmental - Drum storage area | 313        | 229   | 153   | 468        | 498   | 153 | 120  | 135  |
| Scotland_477 | M1      | Environmental - Drum storage area | 313        | 229   | 153   | 468        | 498   | 153 | 120  | 135  |
| Scotland_478 | M1      | Environmental - Drum              | 313        | 229   | 153   | 468        | 498   | 153 | 120  | 135  |
| Scotland_479 | M1      | Environmental - Drum playing area | 313        | 229   | 153   | 468        | 498   | 153 | 120  | 135  |
| Scotland_480 | M1      | Environmental - Drum playing area | 313        | 229   | 153   | 468        | 498   | 153 | 120  | 135  |
| Scotland_481 | M1      | Environmental - Drum playing area | 313        | 229   | 153   | 468        | 498   | 153 | 120  | 135  |
| Scotland_482 | M1      | Environmental - Drum playing area | 313        | 229   | 153   | 468        | 498   | 153 | 120  | 135  |
| Scotland_483 | M1      | Environmental - Drum storage area | 313        | -     | 153   | 468        | 498   | 153 | 120  | 135  |
| Scotland_484 | M1      | Environmental - Drum storage area | 313        | 229   | 153   | 468        | 498   | 153 | 120  | 135  |
| Scotland_485 | M1      | Environmental - Drum storage area | 313        | -     | 153   | 468        | 498   | 153 | 120  | 135  |
| London_491   | M3      | Clinical                          | 313        | 229   | 162   | 512        | 498   | 153 | 123  | 135  |
| London_493   | M3      | Environmental - Hide              | 313        | -     | 162   | 512        | 498   | -   | -    | 135  |
| London_494   | M3      | Environmental - Hide              | 313        | 229   | 162   | 512        | 498   | 153 | -    | 135  |
| London_496   | M4      | Environmental - Drum              | <b>289</b> | 229   | 162   | <b>468</b> | 498   | 153 | 123  | 135  |
| London_497   | M3      | Environmental - Hide              | 313        | 229   | 162   | 512        | 498   | 153 | 123  | 135  |
| London_498   | M3      | Environmental - Hide              | 313        | 229   | 162   | 512        | 498   | -   | -    | 135  |
| London_499   | M3      | Environmental - Hide              | 313        | 229   | -     | 512        | 498   | 153 | 123  | 135  |
| London_500   | M3      | Environmental - Hide              | 313        | 229   | -     | 512        | 498   | 153 | 123  | 135  |
| London_501   | M3      | Environmental - Hide              | 313        | 229   | -     | 512        | 498   | 153 | -    | 135  |

**Supplementary Table 1. Results of MLVA-8 analysis.**

|                | Chr           |       | pXO1          |        | pXO2          |        |
|----------------|---------------|-------|---------------|--------|---------------|--------|
|                | Mean coverage | Stdev | Mean coverage | Stdev  | Mean coverage | Stdev  |
| Scotland_459   | 55.46         | 25.79 | 175.44        | 88.96  | 148.02        | 72.81  |
| Scotland_472   | 64.61         | 27.67 | 218.12        | 105.9  | 146.72        | 69.77  |
| Scotland_473   | 49.88         | 30.01 | 222.32        | 115.38 | 123.88        | 64.67  |
| Scotland_474   | 47.62         | 22.24 | 293.37        | 139.14 | 138.33        | 63.01  |
| Scotland_476   | 39.07         | 20.88 | 205.13        | 88.2   | 98.37         | 41.23  |
| Scotland_477   | 43.09         | 21.31 | 233.67        | 118.79 | 125.55        | 62.73  |
| Scotland_478   | 40            | 18.62 | 239.72        | 110.61 | 128.73        | 57.87  |
| Scotland_479   | 41.03         | 18.7  | 229.89        | 105.55 | 121.98        | 54.22  |
| Scotland_480   | 49.99         | 21.87 | 299.33        | 134.1  | 157.11        | 67.5   |
| Scotland_481   | 60.03         | 31.31 | 282.56        | 158.49 | 164.38        | 89.92  |
| Scotland_482   | 46.45         | 22.2  | 242.5         | 118.88 | 135.15        | 64.69  |
| Scotland_483   | 70.96         | 35.89 | 417.36        | 191.56 | 221.74        | 99.93  |
| Scotland_484   | 65.08         | 30.06 | 377.86        | 183.23 | 198.81        | 93.82  |
| Scotland_485   | 95.75         | 44.14 | 535.33        | 268.9  | 298.04        | 144.05 |
| London_491     | 52.61         | 23.25 | 171.37        | 83.77  | 111.99        | 51.98  |
| London_493     | 69.37         | 287.5 | 147.33        | 76.28  | 82.68         | 41.13  |
| London_494     | 48.63         | 25.16 | 259.74        | 134.84 | 122.43        | 61.26  |
| London_496     | 49.91         | 24.05 | 284.28        | 129.54 | 1.12          | 6.29   |
| London_497     | 61.51         | 28.51 | 369.75        | 184.23 | 161.77        | 75.86  |
| London_498     | 56.45         | 26.77 | 332.46        | 161.6  | 1.36          | 7.57   |
| London_499     | 53.78         | 23.1  | 325.3         | 143.17 | 119.81        | 52.19  |
| London_500     | 48.94         | 24.45 | 259.41        | 122.33 | 137.52        | 63.85  |
| London_501     | 53.98         | 26.5  | 299.52        | 144.74 | 1.25          | 6.83   |
| New York A3082 | 254.69        | 58.11 | 432.56        | 49.3   | 386.57        | 77.44  |

Supplementary Table 2. Coverage data for each strain.

| Name       | Biosample    | Bioproject  | Size (Mb) | GC%   | Scaffolds |
|------------|--------------|-------------|-----------|-------|-----------|
| 3154       | SAMN02470705 | PRJNA178572 | 5.00269   | 35.40 | 3         |
| 3166       | SAMN02470706 | PRJNA178573 | 5.50514   | 35.20 | 5         |
| 95014      | SAMN02951914 | PRJNA224116 | 5.3368    | 35.20 | 27        |
| 2000031006 | SAMN03165110 | PRJNA224116 | 5.44337   | 35.10 | 75        |
| 2000031008 | SAMN03165111 | PRJNA224116 | 5.45101   | 35.10 | 37        |
| 2000031021 | SAMN02736984 | PRJNA224116 | 5.33174   | 35.36 | -         |
| 2000031023 | SAMN03165112 | PRJNA224116 | 5.43554   | 35.10 | 33        |
| 2000031027 | SAMN03165113 | PRJNA224116 | 5.44555   | 35.10 | 51        |
| 2000031031 | SAMN03165114 | PRJNA224116 | 5.4493    | 35.10 | 44        |
| 2000031038 | SAMN03165115 | PRJNA224116 | 5.43107   | 35.10 | 48        |
| 2000031039 | SAMN03165116 | PRJNA224116 | 5.44962   | 35.10 | 34        |
| 2000031052 | SAMN03165117 | PRJNA224116 | 5.27409   | 35.20 | 54        |
| 2000031075 | SAMN03165118 | PRJNA224116 | 5.35337   | 35.10 | 46        |
| 2000031709 | SAMN03165119 | PRJNA224116 | 5.4496    | 35.10 | 35        |
| 2000031765 | SAMN03165120 | PRJNA224116 | 5.44942   | 35.10 | 43        |
| 2000032819 | SAMN03165121 | PRJNA224116 | 5.45031   | 35.10 | 45        |
| 2000032832 | SAMN03165122 | PRJNA224116 | 5.44926   | 35.10 | 36        |
| 2000032879 | SAMN03165123 | PRJNA224116 | 5.44748   | 35.10 | 53        |
| 2000032892 | SAMN03165124 | PRJNA224116 | 5.45053   | 35.10 | 42        |
| 2000032951 | SAMN03165125 | PRJNA224116 | 5.43193   | 35.10 | 56        |
| 2000032967 | SAMN03165126 | PRJNA224116 | 5.44337   | 35.10 | 62        |
| 2000032968 | SAMN03165127 | PRJNA224116 | 5.29679   | 35.10 | 90        |
| 2000032975 | SAMN03165128 | PRJNA224116 | 5.43915   | 35.10 | 51        |
| 2000032979 | SAMN03165129 | PRJNA224116 | 5.43321   | 35.10 | 54        |
| 2000032989 | SAMN03165130 | PRJNA224116 | 5.44396   | 35.10 | 53        |
| 2002013094 | SAMN03174509 | PRJNA224116 | 5.60108   | 35.27 | -         |
| 44-NIAH    | SAMD00026915 | PRJDB3562   | 5.37514   | 35.10 | 124       |
| 52-40-NIAH | SAMD00026914 | PRJDB3563   | 5.44982   | 35.10 | 36        |
| 52-G       | SAMN02951870 | PRJNA224116 | 5.50444   | 35.26 | 3         |
| 8903-G     | SAMN02951868 | PRJNA224116 | 5.50477   | 35.26 | 3         |
| 9080-G     | SAMN02951869 | PRJNA224116 | 5.50866   | 35.26 | 3         |
| A.Br.003   | SAMN02736983 | PRJNA224116 | 5.48772   | 35.20 | 3         |
| A0157      | SAMN03267488 | PRJNA224116 | 5.32224   | 35.46 | 2         |
| A0174      | SAMN02470265 | PRJNA55003  | 5.29191   | 35.20 | 60        |
| A0193      | SAMN02470282 | PRJNA55005  | 5.39288   | 35.10 | 60        |
| A0248      | SAMN02603932 | PRJNA33543  | 5.50393   | 35.26 | -         |
| A0389      | SAMN02470266 | PRJNA27917  | 5.4204    | 35.17 | 68        |
| A0442      | SAMN02470279 | PRJNA27915  | 5.37484   | 35.20 | 46        |
| A0465      | SAMN02470255 | PRJNA27919  | 5.40715   | 35.20 | 57        |
| A0488      | SAMN02470254 | PRJNA27913  | 5.39217   | 35.20 | 63        |
| A1039      | SAMN02999502 | PRJNA224116 | 5.45826   | 35.10 | 32        |
| A1055      | SAMN02435882 | PRJNA10795  | 5.37062   | 35.30 | 42        |
| A1075      | SAMN02999503 | PRJNA224116 | 5.45987   | 35.07 | 26        |
| A1144      | SAMN02999504 | PRJNA224116 | 5.47706   | 35.26 | -         |
| A16        | SAMN02641483 | PRJNA224116 | 5.5045    | 35.26 | -         |
| A16R       | SAMN02641484 | PRJNA224116 | 5.40945   | 35.30 | -         |
| A2012      | SAMN02435829 | PRJNA54101  | 5.37006   | 35.16 | 3         |

|                      |              |             |         |       |    |
|----------------------|--------------|-------------|---------|-------|----|
| Ames                 | SAMN02603432 | PRJNA57909  | 5.22729 | 35.40 | -  |
| Ames A0462           | SAMN03290655 | PRJNA224116 | 5.50391 | 35.26 | -  |
| Ames Ancestor; A2084 | SAMN02603433 | PRJNA10784  | 5.50393 | 35.26 | -  |
| Ames_BA1004          | SAMN03201418 | PRJNA224116 | 5.50397 | 35.26 | -  |
| ANSES_00-82          | SAMN02699416 | PRJNA224116 | 5.43601 | 35.10 | 28 |
| ANSES_08-8_20        | SAMN02693047 | PRJNA224116 | 5.44071 | 35.10 | 31 |
| ANSES_99-100         | SAMN02699415 | PRJNA224116 | 5.44647 | 35.10 | 30 |
| Australia 94         | SAMN02435830 | PRJNA10799  | 5.50456 | 35.20 | 49 |
| BA1015               | SAMN03010426 | PRJNA224116 | 5.49118 | 35.26 | -  |
| BA1035               | SAMN03010427 | PRJNA224116 | 5.48726 | 35.26 | -  |
| BF1                  | SAMN02469407 | PRJNA171093 | 5.43453 | 35.06 | 56 |
| BFV                  | SAMN02736972 | PRJNA224116 | 5.50835 | 35.27 | 3  |
| Canadian_bison       | SAMN03202901 | PRJNA224116 | 5.50577 | 35.26 | -  |
| Carbosap             | SAMN02910129 | PRJNA224116 | 5.40767 | 35.10 | 18 |
| Carbosap             | SAMN02470598 | PRJNA198410 | 5.40297 | 35.10 | 21 |
| CDC 684              | SAMN02603931 | PRJNA31329  | 5.50676 | 35.26 | -  |
| CNEVA-9066           | SAMN02435891 | PRJNA10796  | 5.48868 | 35.20 | 30 |
| Cvac02               | SAMN02898388 | PRJNA224116 | 5.22717 | 35.40 | -  |
| CZC5                 | -            | PRJNA224116 | 5.45434 | 35.10 | 25 |
| delta Sterne         | SAMN02736981 | PRJNA224116 | 5.22965 | 35.40 | 1  |
| Gmb1                 | SAMEA2272630 | PRJNA198415 | 5.17508 | 35.20 | 39 |
| H9401                | SAMN02603474 | PRJNA49361  | 5.49547 | 35.26 | -  |
| Han                  | SAMN02898318 | PRJNA224116 | 5.22543 | 35.40 | -  |
| Heroin Ba4599        | SAMN02470707 | PRJNA72893  | 5.46838 | 35.10 | 46 |
| HYU01                | SAMN02874036 | PRJNA224116 | 5.49012 | 35.26 | -  |
| K0021                | SAMN03757457 | PRJNA257008 | 5.45962 | 35.10 | 31 |
| K1129                | SAMN03757460 | PRJNA257008 | 5.46076 | 35.10 | 36 |
| K1285                | SAMN03757454 | PRJNA257008 | 5.46083 | 35.10 | 36 |
| K2129                | SAMN03757455 | PRJNA257008 | 5.45942 | 35.10 | 28 |
| K2883                | SAMN03757456 | PRJNA257008 | 5.45845 | 35.10 | 32 |
| K3                   | SAMN03010428 | PRJNA224116 | 5.50499 | 35.26 | -  |
| K3974                | SAMN03757459 | PRJNA257008 | 5.45099 | 35.10 | 41 |
| K4834                | SAMN03757458 | PRJNA257008 | 5.45061 | 35.10 | 69 |
| K8215                | SAMN03757461 | PRJNA257008 | 5.45873 | 35.10 | 42 |
| Kruger B             | SAMN02435884 | PRJNA324    | 5.47001 | 35.10 | 64 |
| Ohio ACB             | SAMN03010429 | PRJNA224116 | 5.49834 | 35.26 | -  |
| PAK-1                | SAMN03010430 | PRJNA224116 | 5.40338 | 35.30 | -  |
| Pasteur              | SAMN03024436 | PRJNA224116 | 5.2948  | 35.36 | -  |
| Pollino              | SAMN03296000 | PRJNA224116 | 5.50389 | 35.26 | 3  |
| RA3                  | SAMN03075602 | PRJNA224116 | 5.48987 | 35.26 | -  |
| Sen2Col2             | SAMEA2272511 | PRJNA198413 | 5.17411 | 35.20 | 44 |
| Sen3                 | SAMEA2272292 | PRJNA198414 | 5.17379 | 35.20 | 50 |
| SK-102               | SAMN03012770 | PRJNA224116 | 5.50566 | 35.27 | -  |
| Smith 1013           | SAMN02732407 | PRJNA224116 | 5.28699 | 35.26 | 2  |
| Sterne               | SAMN02598266 | PRJNA58091  | 5.22866 | 35.40 | -  |
| SVA11                | SAMN03081486 | PRJNA224116 | 5.48752 | 35.26 | -  |

|                       |              |             |         |       |     |
|-----------------------|--------------|-------------|---------|-------|-----|
| Tsiankovskii-I        | SAMN02436236 | PRJNA17709  | 5.50473 | 35.20 | 56  |
| Turkey32              | SAMN03010432 | PRJNA224116 | 5.5053  | 35.26 | -   |
| UR-1                  | SAMN02469406 | PRJNA170826 | 5.44661 | 35.10 | 109 |
| V770-NP-1R            | SAMN03092715 | PRJNA224116 | 5.4104  | 35.30 | -   |
| Vollum                | SAMN02736982 | PRJNA224116 | 5.50619 | 35.26 | -   |
| Vollum                | SAMN02435883 | PRJNA10797  | 5.48846 | 35.20 | 52  |
| Vollum 1B             | SAMN03010433 | PRJNA224116 | 5.50663 | 35.26 | -   |
| Western North America |              |             |         |       |     |
| USA6153               | SAMN02435885 | PRJNA337    | 5.51135 | 35.20 | 44  |
| Zimbabwe 89           | SAMN02736952 | PRJNA224116 | 5.46092 | 35.10 | 3   |
| London_491            | SAMN03790801 | PRJNA287512 | 5.65748 | 35.13 | 61  |
| London_493            | SAMN03790802 | PRJNA287512 | 5.43900 | 35.09 | 38  |
| London_494            | SAMN03790803 | PRJNA287512 | 5.48906 | 35.14 | 126 |
| London_496            | SAMN03790804 | PRJNA287512 | 5.43824 | 35.11 | 77  |
| London_497            | SAMN03790805 | PRJNA287512 | 5.66571 | 35.12 | 90  |
| London_498            | SAMN03790806 | PRJNA287512 | 5.43545 | 35.09 | 88  |
| London_499            | SAMN03790807 | PRJNA287512 | 5.59241 | 35.13 | 87  |
| London_500            | SAMN03790808 | PRJNA287512 | 5.65717 | 35.13 | 51  |
| London_501            | SAMN03790809 | PRJNA287512 | 5.44360 | 35.10 | 39  |
| Scotland_459          | SAMN03790787 | PRJNA287512 | 5.43102 | 35.10 | 85  |
| Scotland_472          | SAMN03790788 | PRJNA287512 | 5.55289 | 35.12 | 55  |
| Scotland_473          | SAMN03790789 | PRJNA287512 | 5.43875 | 35.10 | 50  |
| Scotland_474          | SAMN03790790 | PRJNA287512 | 5.43733 | 35.09 | 36  |
| Scotland_476          | SAMN03790791 | PRJNA287512 | 5.44180 | 35.09 | 33  |
| Scotland_477          | SAMN03790792 | PRJNA287512 | 5.53287 | 35.12 | 75  |
| Scotland_478          | SAMN03790793 | PRJNA287512 | 5.52391 | 35.23 | 149 |
| Scotland_479          | SAMN03790794 | PRJNA287512 | 5.65273 | 35.14 | 95  |
| Scotland_480          | SAMN03790795 | PRJNA287512 | 5.34597 | 35.13 | 47  |
| Scotland_481          | SAMN03790796 | PRJNA287512 | 5.43893 | 35.11 | 85  |
| Scotland_482          | SAMN03790797 | PRJNA287512 | 5.34147 | 35.13 | 57  |
| Scotland_483          | SAMN03790798 | PRJNA287512 | 5.43958 | 35.08 | 33  |
| Scotland_484          | SAMN03790799 | PRJNA287512 | 5.44473 | 35.11 | 58  |
| Scotland_485          | SAMN03790800 | PRJNA287512 | 5.34105 | 35.12 | 35  |
| New York A3802        |              | PRJNA287512 | 5.44514 | 35.08 | 26  |

**Supplementray Table 3. Sequences used in phylogenetic analysis.**
